# Supplementary material for: Photochemistry of the sea-surface microlayer (SML) influenced by a phytoplankton bloom: A mesocosm study
Source: Copernicus journal article supplement (doi:10.5194/egusphere-2025-4066), 2025-08-29
Supplement: Supplementary file 1 [file egusphere-2025-4066-supplement.pdf]

## Supplementary Information of

# Photochemistry of the sea-surface microlayer (SML) influenced by a 5 phytoplankton bloom: A mesocosm study

Olenka Jibaja Valderrama, Daniele Scheres Firak, Thomas Schaefer, Manuela van Pinxteren, Kanneh Wadinga Fomba, Hartmut Herrmann\*

Atmospheric Chemistry Department (ACD), Leibniz-Institute for Tropospheric Research (TROPOS), Leipzig, 04318, Germany

10 \*Correspondence to: Hartmut Herrmann (herrmann@tropos.de)

### S1 Ferrioxalate actinometry

The ferrioxalate actinometer is among the most widely used system due to its strong absorption in the UV-Vis spectrum. When exposed to light, Fe(III) photochemically decomposed to form Fe (II), and this process can be quantified via complexation with 1,10-phenanthroline (Hatchard and Parker, 1956). The simplified reaction mechanisms for the photolysis of Fe (III) and  
15 the complexation of Fe (II) with 1,10 phenanthroline are:

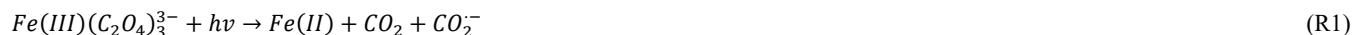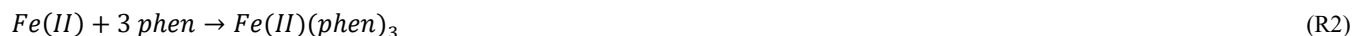

The potassium ferrioxalate solution was placed inside the photoreactor and the first aliquot (2 mL) was extracted before the irradiation with the same solar simulator used for the ambient seawater samples. After that, the Xe lamp was turned on and  
20 light-exposed aliquots (2 mL each) were collected every 20 seconds for 2 minutes. The time was accurately controlled using a timer. All this process took place under continuous stirring. Right after extraction, all the collected aliquots were put together in amber glass bottles with the previously prepared mixtures of ultra-pure water, sodium acetate, 1,10-phenanthroline hydrochloride monohydrate (Fluka) and sulphuric acid (96 %, Merck) to form the complex. The total volume of the complex was 10 mL. The volumes of each solution of the mixture were chosen so the measured absorbance of the complex at 510 nm  
25 was below 1.0. The amber glass bottles were covered with aluminium foil and stored in a dark shelf for 40 minutes to complete the complexation. After that, the absorbance of each sample at 510 nm was measured in high performance 10 x 10 mm quartz glass cuvette (Hellma) with a UV/VIS spectrometer (PerkinElmer Instruments). Data was acquired using the Lambda 900 software. The absorbance of the complexes for each light-exposure time was calculated from the average of two values

measured consecutively. The molar concentrations of the complexes ( $c_{complex}$ , mol L<sup>-1</sup>) were calculated using the Lambert-Beer

30 Law:

$$A_{510\text{ nm}} = \varepsilon_{510\text{ nm}} \times l \times c_{complex} \quad (1)$$

Where  $A_{510\text{ nm}}$  is the absorbance at 510 nm,  $\varepsilon_{510\text{ nm}}$  is the molar absorption coefficient of the complex at 510 nm (11100 L mol<sup>-1</sup> cm<sup>-1</sup>) (Goldstein and Rabani, 2008),  $l$  is the pathlength (1 cm). The molar concentration of Fe(II) produced in each sample ( $c_{Fe(II)}$ ) was determined from the calculated molar concentrations of the complexes, the volume of actinometer extracted (2  
35 mL), and the volume of complex prepared (10 mL). The wavelength-dependent photon fluxes ( $q_\lambda$ , moles of photons L<sup>-1</sup> s<sup>-1</sup>) were obtained from:

$$q_\lambda = \frac{\phi_\lambda \times c_{Fe(II)}}{t} \quad (2)$$

Where  $\phi_\lambda$  is the wavelength-dependent quantum yield for the formation of Fe(II), and  $t$  is light-exposure time (s). The quantum yield used for the estimations is the average of the quantum yields reported for the same concentrations of potassium  
40 ferrioxalate solutions (Hatchard and Parker, 1956; Wegner and Adamson, 1966; Demas et al., 1981; Lee and Seliger, 1964; Langford and Holubov, 1981), and for wavelengths relevant in the sea-surface (290 to 509 nm).

## S2 Setup used for in situ EPR spectroscopy experiments

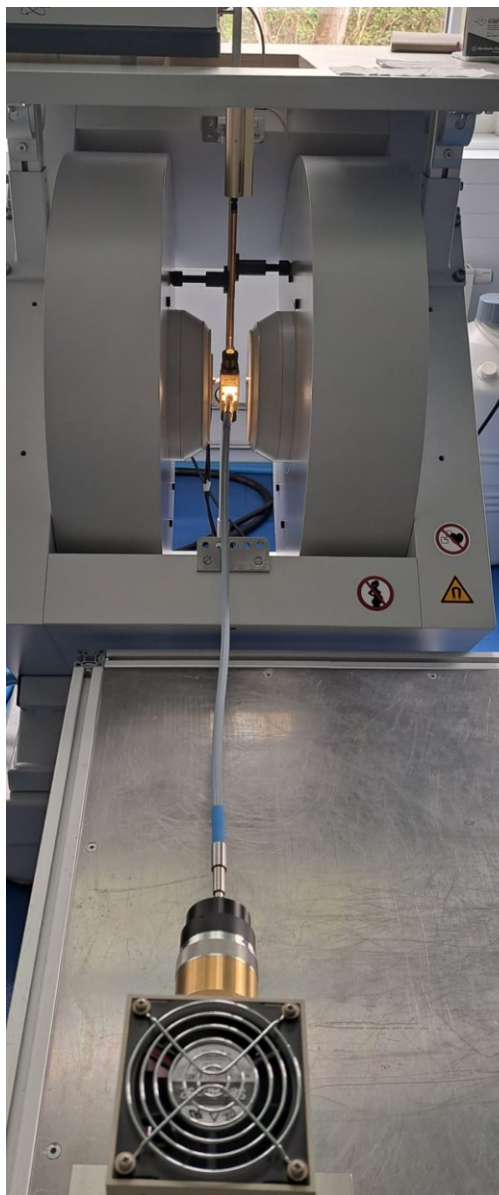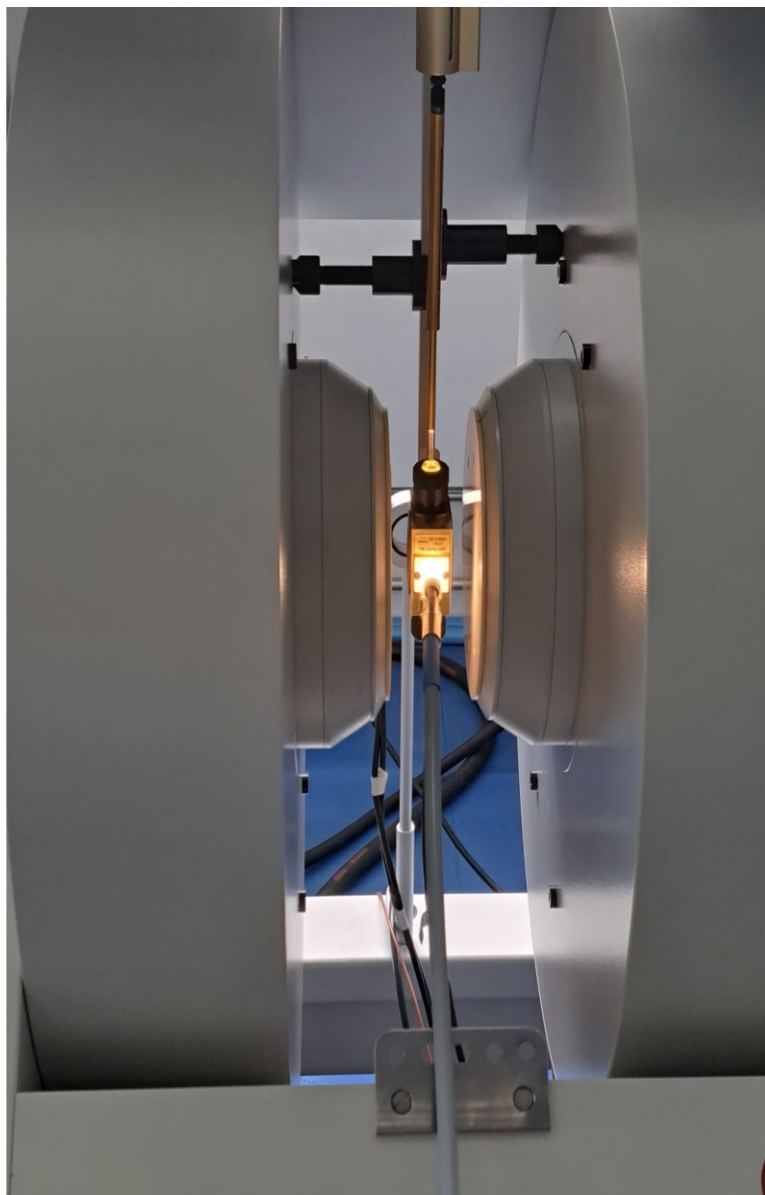

45

**Figure S1:** The setup used in the in situ EPR experiments.

### S3 EPR control tests in the presence of Fe(II), Fe(III), Cu(I), and Cu(II) chloride salts

50 To attest to the participation of direct electron transfer between transition metal ions dominant in the SML and ULW samples, control experiments were performed in the presence of FeCl<sub>3</sub>, FeCl<sub>2</sub>, CuCl and CuCl<sub>2</sub>. Chloride salts were chosen due to the prevalence of chloride in the samples. In situ EPR experiments were conducted in the presence of 500 nM of each individual salt and in mixtures between Fe and Cu salts. As can be seen in Figure S2, Cu had a big influence on the monitored rates of CM radical formation, with formation rates reaching 16  $\mu\text{M s}^{-1}$ . Fe salts presented minor activity. Responses were corrected

55 considering the photon-fluxes estimated for the PR (Photochemical reactor) as follows:

$$\text{Corrected responses} = \text{Rate CM radical formation} \times \frac{I_{PR}}{I_{EPR}} \quad (3)$$

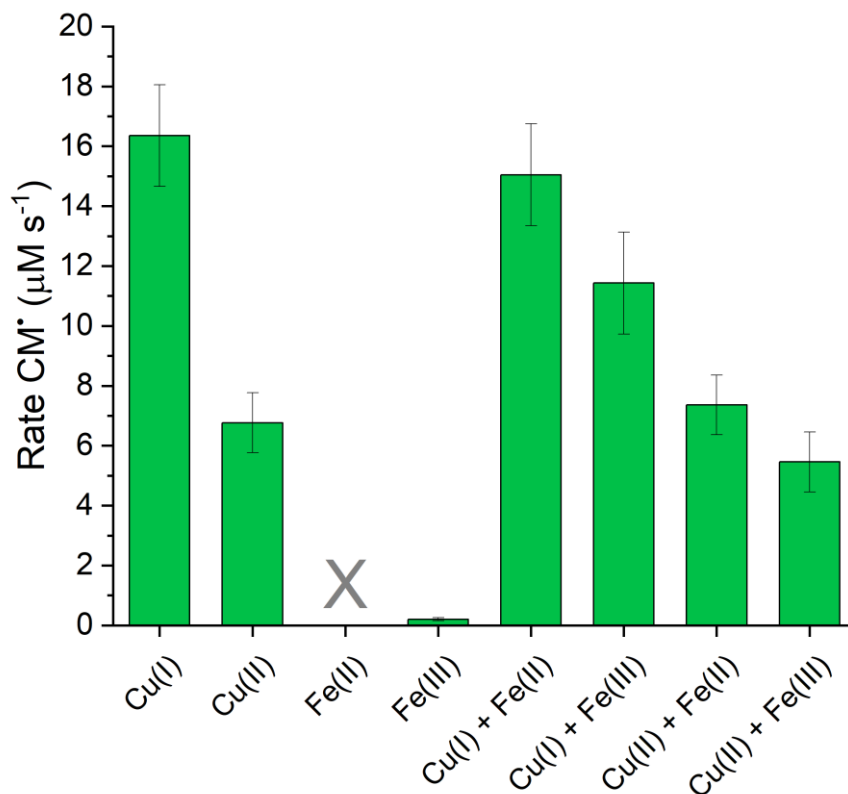

Figure S2: EPR control tests in the presence of Fe(II), Fe(III), Cu(I), and Cu(II) chloride salts.

Table S1: Concentrations of carbonyl compounds in nmol L<sup>-1</sup> before, after 2.5 hours and after 5 hours of irradiation for samples collected on May 20<sup>th</sup>.

| Compound                    | SML                |                                |                              | ULW                |                                |                              |
|-----------------------------|--------------------|--------------------------------|------------------------------|--------------------|--------------------------------|------------------------------|
|                             | Before irradiation | After 2.5 hours of irradiation | After 5 hours of irradiation | Before irradiation | After 2.5 hours of irradiation | After 5 hours of irradiation |
| Acetophenone                | 20                 | 25                             | 32                           | n.d.               | 1                              | 6                            |
| Acrolein                    | 0                  | 0                              | 539                          | n.d.               | n.d.                           | n.d.                         |
| Benzaldehyde                | 4097               | 3872                           | 3710                         | 27                 | 57                             | 91                           |
| Biacetyl                    | 1368               | 1285                           | 1548                         | 326                | 369                            | 386                          |
| Butanal                     | 16                 | 111                            | 270                          | 79                 | 128                            | 173                          |
| Crotonaldehyde              | n.d.               | n.d.                           | n.d.                         | n.d.               | n.d.                           | n.d.                         |
| Glyoxal                     | 2138               | 2164                           | 2620                         | 945                | 995                            | 1097                         |
| Heptanal                    | 793                | 828                            | 981                          | 160                | 159                            | 222                          |
| Hexanal                     | 2806               | 2786                           | 3171                         | 572                | 580                            | 771                          |
| Isovaleraldehyde            | 1381               | 1420                           | 1490                         | 197                | 221                            | 276                          |
| Methacrolein                | n.d.               | n.d.                           | n.d.                         | n.d.               | n.d.                           | n.d.                         |
| Methylglyoxal               | 1136               | 1179                           | 1522                         | 1635               | 1552                           | 1650                         |
| MVK                         | 1081               | 1246                           | 1469                         | 529                | 4734                           | 482                          |
| Octanal                     | 75                 | n.d.                           | 18                           | 57                 | 8                              | 111                          |
| Propanal                    | 1457               | 1933                           | 2606                         | 1756               | 2053                           | 2202                         |
| Trans-2-hexenal             | 53                 | 47                             | 7                            | 12                 | 20                             | 18                           |
| Trans, trans-2.4-hexadienal | 34                 | 45                             | 52                           | 21                 | 23                             | 23                           |

n.d.: Not detectable

**Table S2: Concentrations of carbonyl compounds in nmol L<sup>-1</sup> before, after 2.5 hours and after 5 hours of irradiation for samples collected on May 22<sup>nd</sup>.**

| Compound                    | SML                |                                |                              | ULW                |                                |                              |
|-----------------------------|--------------------|--------------------------------|------------------------------|--------------------|--------------------------------|------------------------------|
|                             | Before irradiation | After 2.5 hours of irradiation | After 5 hours of irradiation | Before irradiation | After 2.5 hours of irradiation | After 5 hours of irradiation |
| Acetophenone                | 40                 | 39                             | 48                           | n.a.               |                                |                              |
| Acrolein                    | 2621               | 1982                           | 1108                         |                    |                                |                              |
| Benzaldehyde                | 3626               | 3101                           | 2802                         |                    |                                |                              |
| Biacetyl                    | 2968               | 3132                           | 3511                         |                    |                                |                              |
| Butanal                     | 38                 | n.d.                           | n.d.                         |                    |                                |                              |
| Crotonaldehyde              | 1033               | 309                            | n.d.                         |                    |                                |                              |
| Glyoxal                     | 2022               | 1952                           | 1786                         |                    |                                |                              |
| Heptanal                    | 1787               | 1596                           | 2217                         |                    |                                |                              |
| Hexanal                     | 13198              | 11600                          | 12451                        |                    |                                |                              |
| Isovaleraldehyde            | 4174               | 2729                           | 1638                         |                    |                                |                              |
| Methacrolein                | 8723               | 7974                           | 7698                         |                    |                                |                              |
| Methylglyoxal               | 545                | 451                            | 657                          |                    |                                |                              |
| MVK                         | 12439              | 13835                          | 14781                        |                    |                                |                              |
| Octanal                     | 57                 | 295                            | 644                          |                    |                                |                              |
| Propanal                    | 5099               | 3179                           | 2293                         |                    |                                |                              |
| Trans-2-hexenal             | 154                | 190                            | 275                          |                    |                                |                              |
| Trans, trans-2.4-hexadienal | 67                 | 62                             | 63                           |                    |                                |                              |

n.d.: Not detectable; n.a.: Not available

**Table S3: Concentrations of carbonyl compounds in nmol L<sup>-1</sup> before, after 2.5 hours and after 5 hours of irradiation for samples collected on May 23<sup>rd</sup>.**

| Compound                    | SML                |                                |                              | ULW                |                                |                              |
|-----------------------------|--------------------|--------------------------------|------------------------------|--------------------|--------------------------------|------------------------------|
|                             | Before irradiation | After 2.5 hours of irradiation | After 5 hours of irradiation | Before irradiation | After 2.5 hours of irradiation | After 5 hours of irradiation |
| Acetophenone                | 48                 | 48                             | 52                           | n.a.               |                                |                              |
| Acrolein                    | 0                  | 220                            | 1098                         |                    |                                |                              |
| Benzaldehyde                | 6521               | 6596                           | 7141                         |                    |                                |                              |
| Biacetyl                    | 2017               | 3047                           | 3385                         |                    |                                |                              |
| Butanal                     | 58                 | 187                            | 381                          |                    |                                |                              |
| Crotonaldehyde              | 68                 | 767                            | 819                          |                    |                                |                              |
| Glyoxal                     | 1882               | 2438                           | 2693                         |                    |                                |                              |
| Heptanal                    | 759                | 676                            | 1139                         |                    |                                |                              |
| Hexanal                     | 3365               | 3829                           | 4448                         |                    |                                |                              |
| Isovaleraldehyde            | 1831               | 2322                           | 2291                         |                    |                                |                              |
| Methacrolein                | n.d.               | 251                            | 468                          |                    |                                |                              |
| Methylglyoxal               | 749                | 1246                           | 1602                         |                    |                                |                              |
| MVK                         | 1278               | 1671                           | 1992                         |                    |                                |                              |
| Octanal                     | 81                 | 73                             | 138                          |                    |                                |                              |
| Propanal                    | 1844               | 2691                           | 3607                         |                    |                                |                              |
| Trans-2-hexenal             | 48                 | 22                             | 70                           |                    |                                |                              |
| Trans, trans-2.4-hexadienal | 29                 | 46                             | 62                           |                    |                                |                              |

n.d.: Not detectable; n.a.: Not available

**Table S4: Concentrations of carbonyl compounds in nmol L<sup>-1</sup> before, after 2.5 hours and after 5 hours of irradiation for samples collected on May 26<sup>th</sup>.**

| Compound                    | SML                |                                |                              | ULW                |                                |                              |
|-----------------------------|--------------------|--------------------------------|------------------------------|--------------------|--------------------------------|------------------------------|
|                             | Before irradiation | After 2.5 hours of irradiation | After 5 hours of irradiation | Before irradiation | After 2.5 hours of irradiation | After 5 hours of irradiation |
| Acetophenone                | 29                 | 34                             | 35                           | 3                  | 6                              | 7                            |
| Acrolein                    | 1139               | 4476                           | 5811                         | n.d.               | n.d.                           | 314                          |
| Benzaldehyde                | 1071               | 1082                           | 994                          | 60                 | 112                            | 124                          |
| Biacetyl                    | 1966               | 2830                           | 3179                         | 374                | 651                            | 623                          |
| Butanal                     | n.d.               | n.d.                           | n.d.                         | 98                 | 148                            | 243                          |
| Crotonaldehyde              | 7398               | 8762                           | 9158                         | 423                | 466                            | 590                          |
| Glyoxal                     | 1006               | 1819                           | 2355                         | 912                | 1210                           | 1127                         |
| Heptanal                    | 885                | 596                            | 1328                         | 152                | 297                            | 468                          |
| Hexanal                     | 2178               | 3444                           | 4823                         | 551                | 915                            | 1222                         |
| Isovaleraldehyde            | 11242              | 11528                          | 11667                        | 376                | 360                            | 442                          |
| Methacrolein                | 2196               | 2813                           | 3589                         | 0                  | 13                             | 8                            |
| Methylglyoxal               | 677                | 1136                           | 1337                         | 274                | 441                            | 419                          |
| MVK                         | 2455               | 3323                           | 6422                         | 461                | 600                            | 582                          |
| Octanal                     | n.d.               | n.d.                           | 28                           | n.d.               | 54                             | 101                          |
| Propanal                    | n.d.               | n.d.                           | n.d.                         | 2940               | 3390                           | 3675                         |
| Trans-2-hexenal             | 102                | 101                            | 135                          | 20                 | 19                             | 41                           |
| Trans, trans-2,4-hexadienal | 3346               | 3369                           | 3373                         | 32                 | 36                             | 35                           |

n.d.: Not detectable



**Table S5: Concentrations of carbonyl compounds in nmol L<sup>-1</sup> before, after 2.5 hours and after 5 hours of irradiation for samples collected on May 27<sup>th</sup>.**

| Compound                    | SML                |                                |                              | ULW                |                                |                              |
|-----------------------------|--------------------|--------------------------------|------------------------------|--------------------|--------------------------------|------------------------------|
|                             | Before irradiation | After 2.5 hours of irradiation | After 5 hours of irradiation | Before irradiation | After 2.5 hours of irradiation | After 5 hours of irradiation |
| Acetophenone                | 43                 | 58                             | 70                           | n.a.               |                                |                              |
| Acrolein                    | 10539              | 10940                          | 11986                        |                    |                                |                              |
| Benzaldehyde                | 4529               | 4369                           | 4407                         |                    |                                |                              |
| Biacetyl                    | 791                | 830                            | 931                          |                    |                                |                              |
| Butanal                     | 2172               | 4190                           | 4379                         |                    |                                |                              |
| Crotonaldehyde              | 2132               | 2280                           | 2349                         |                    |                                |                              |
| Glyoxal                     | 2401               | 3060                           | 2583                         |                    |                                |                              |
| Heptanal                    | 5332               | 5340                           | 5556                         |                    |                                |                              |
| Hexanal                     | 26371              | 24528                          | 25868                        |                    |                                |                              |
| Isovaleraldehyde            | 4597               | 4710                           | 4808                         |                    |                                |                              |
| Methacrolein                | 30746              | 33997                          | 54660                        |                    |                                |                              |
| Methylglyoxal               | 901                | 1123                           | 1087                         |                    |                                |                              |
| MVK                         | 27064              | 40011                          | 62828                        |                    |                                |                              |
| Octanal                     | 414                | 622                            | 772                          |                    |                                |                              |
| Propanal                    | 38117              | 39764                          | 39613                        |                    |                                |                              |
| Trans-2-hexenal             | 700                | 624                            | 755                          |                    |                                |                              |
| Trans, trans-2.4-hexadienal | 3579               | 3551                           | 3547                         |                    |                                |                              |

n.a.: Not available

**Table S6: Concentrations of carbonyl compounds in nmol L<sup>-1</sup> before, after 2.5 hours and after 5 hours of irradiation for samples collected on May 28<sup>th</sup>.**

| Compound                    | SML                |                                |                              | ULW                |                                |                              |
|-----------------------------|--------------------|--------------------------------|------------------------------|--------------------|--------------------------------|------------------------------|
|                             | Before irradiation | After 2.5 hours of irradiation | After 5 hours of irradiation | Before irradiation | After 2.5 hours of irradiation | After 5 hours of irradiation |
| Acetophenone                | 37                 | 69                             | 66                           | 6                  | 6                              | 9                            |
| Acrolein                    | 2741               | 4379                           | 5020                         | 343                | 391                            | 796                          |
| Benzaldehyde                | 4186               | 4186                           | 3648                         | 57                 | 62                             | 126                          |
| Biacetyl                    | 2636               | 2910                           | 3352                         | 659                | 488                            | 778                          |
| Butanal                     | 1203               | 1351                           | 1639                         | 124                | 140                            | 225                          |
| Crotonaldehyde              | 980                | 1251                           | 1144                         | 437                | 487                            | 563                          |
| Glyoxal                     | 10075              | 9215                           | 11728                        | 1648               | 1679                           | 2155                         |
| Heptanal                    | 2166               | 1846                           | 1860                         | 289                | 344                            | 603                          |
| Hexanal                     | 17643              | 12420                          | 11485                        | 1304               | 1642                           | 2205                         |
| Isovaleraldehyde            | 2120               | 2396                           | 1954                         | 406                | 503                            | 1093                         |
| Methacrolein                | 750                | 883                            | 917                          | 3                  | 0                              | 37                           |
| Methylglyoxal               | 2782               | 3042                           | 3916                         | 336                | 315                            | 566                          |
| MVK                         | 3038               | 3258                           | 3832                         | 568                | 581                            | 1755                         |
| Octanal                     | 520                | 326                            | 274                          | 91                 | 60                             | 29                           |
| Propanal                    | 19417              | 20707                          | 20767                        | 5873               | 6038                           | 7087                         |
| Trans-2-hexenal             | 428                | 447                            | 505                          | 46                 | 53                             | 123                          |
| Trans, trans-2,4-hexadienal | 495                | 533                            | 491                          | 68                 | 71                             | 74                           |

90 **Table S7: Concentrations of carbonyl compounds in nmol L<sup>-1</sup> before, after 2.5 hours and after 5 hours of irradiation for samples collected on May 30<sup>th</sup>.**

| Compound                    | SML                |                                |                              | ULW                |                                |                              |
|-----------------------------|--------------------|--------------------------------|------------------------------|--------------------|--------------------------------|------------------------------|
|                             | Before irradiation | After 2.5 hours of irradiation | After 5 hours of irradiation | Before irradiation | After 2.5 hours of irradiation | After 5 hours of irradiation |
| Acetophenone                | 165                | 182                            | 191                          | 1                  | 1                              | 3                            |
| Acrolein                    | 34194              | 34244                          | 46282                        | 214                | 389                            | 874                          |
| Benzaldehyde                | 4949               | 4283                           | 4802                         | 56                 | 64                             | 100                          |
| Biacetyl                    | 5340               | 3482                           | 7628                         | 240                | 392                            | 471                          |
| Butanal                     | 14798              | 15284                          | 20000                        | 70                 | 108                            | 152                          |
| Crotonaldehyde              | 10273              | 12089                          | 15561                        | n.d.               | n.d.                           | n.d.                         |
| Glyoxal                     | 17076              | 13880                          | 22758                        | 1748               | 1887                           | 1655                         |
| Heptanal                    | 8670               | 8138                           | 10794                        | 244                | 248                            | 347                          |
| Hexanal                     | 61443              | 51212                          | 57762                        | 850                | 1004                           | 1239                         |
| Isovaleraldehyde            | 4338               | 4930                           | 7051                         | 327                | 254                            | 250                          |
| Methacrolein                | 1016               | 2074                           | 3542                         | 0                  | 0                              | 0                            |
| Methylglyoxal               | 3135               | 3723                           | 5139                         | 355                | 369                            | 298                          |
| MVK                         | 13470              | 14955                          | 20524                        | 596                | 671                            | 687                          |
| Octanal                     | 802                | 446                            | 627                          | 22                 | 50                             | 77                           |
| Propanal                    | 126758             | 129110                         | 171869                       | 4006               | 4524                           | 5707                         |
| Trans-2-hexenal             | 3023               | 3003                           | 2384                         | 34                 | 41                             | 56                           |
| Trans, trans-2,4-hexadienal | 1535               | 1476                           | 1632                         | 50                 | 54                             | 62                           |

n.d.: Not detectable

95 **Table S8: Concentrations of carbonyl compounds in nmol L<sup>-1</sup> before, after 2.5 hours and after 5 hours of irradiation for samples collected on June 1<sup>st</sup>.**

| Compound                    | SML                |                                |                              | ULW                |                                |                              |
|-----------------------------|--------------------|--------------------------------|------------------------------|--------------------|--------------------------------|------------------------------|
|                             | Before irradiation | After 2.5 hours of irradiation | After 5 hours of irradiation | Before irradiation | After 2.5 hours of irradiation | After 5 hours of irradiation |
| Acetophenone                | 89                 | 91                             | 93                           | 5                  | 6                              | 7                            |
| Acrolein                    | 12372              | 22212                          | 28659                        | 3113               | 3643                           | 4494                         |
| Benzaldehyde                | 4781               | 4647                           | 4657                         | 55                 | 132                            | 91                           |
| Biacetyl                    | 1232               | 1377                           | 1871                         | 153                | 220                            | 371                          |
| Butanal                     | 17698              | 18342                          | 18503                        | 754                | 809                            | 827                          |
| Crotonaldehyde              | 5634               | 6577                           | 7468                         | 1153               | 1302                           | 1303                         |
| Glyoxal                     | 7370               | 9382                           | 12134                        | 440                | 539                            | 618                          |
| Heptanal                    | 12721              | 16400                          | 17580                        | 735                | 882                            | 995                          |
| Hexanal                     | 89702              | 68921                          | 65663                        | 2209               | 2174                           | 2174                         |
| Isovaleraldehyde            | 4811               | 4794                           | 5817                         | 406                | 750                            | 659                          |
| Methacrolein                | 699                | 1497                           | 1784                         | 57                 | 95                             | 114                          |
| Methylglyoxal               | 2245               | 2853                           | 3604                         | 106                | 172                            | 206                          |
| MVK                         | 2800               | 3909                           | 4545                         | 1383               | 1545                           | 1608                         |
| Octanal                     | 2288               | 1988                           | 2740                         | 105                | 133                            | 96                           |
| Propanal                    | 130401             | 130580                         | 128340                       | 12512              | 12656                          | 13044                        |
| Trans-2-hexenal             | 15772              | 15040                          | 13508                        | 145                | 138                            | 154                          |
| Trans, trans-2,4-hexadienal | 2766               | 2918                           | 3036                         | 74                 | 77                             | 75                           |

**Table S9: Concentrations of carbonyl compounds in nmol L<sup>-1</sup> before, after 2.5 hours and after 5 hours of irradiation for samples collected on June 2<sup>nd</sup>.**

| Compound                    | SML                |                                |                              | ULW                |                                |                              |
|-----------------------------|--------------------|--------------------------------|------------------------------|--------------------|--------------------------------|------------------------------|
|                             | Before irradiation | After 2.5 hours of irradiation | After 5 hours of irradiation | Before irradiation | After 2.5 hours of irradiation | After 5 hours of irradiation |
| Acetophenone                | 35                 | 44                             | 24                           | 2                  | 6                              | 7                            |
| Acrolein                    | 7725               | 11415                          | 11341                        | 1507               | 1765                           | 2728                         |
| Benzaldehyde                | 2646               | 2585                           | 2577                         | 38                 | 87                             | 143                          |
| Biacetyl                    | 520                | 729                            | 875                          | 288                | 437                            | 883                          |
| Butanal                     | 6015               | 6682                           | 5790                         | 394                | 370                            | 533                          |
| Crotonaldehyde              | 1862               | 2456                           | 2650                         | 617                | 212                            | 668                          |
| Glyoxal                     | 2981               | 2969                           | 3830                         | 749                | 1129                           | 1921                         |
| Heptanal                    | 3733               | 5916                           | 7033                         | 388                | 490                            | 610                          |
| Hexanal                     | 23202              | 20152                          | 18397                        | 2575               | 1985                           | 2548                         |
| Isovaleraldehyde            | 4020               | 4300                           | 3447                         | 338                | 65                             | 364                          |
| Methacrolein                | 872                | 1430                           | 1163                         | 0                  | 0                              | 54                           |
| Methylglyoxal               | 1345               | 1620                           | 1921                         | 250                | 424                            | 810                          |
| MVK                         | 1124               | 1329                           | 1586                         | 313                | 445                            | 746                          |
| Octanal                     | 787                | 590                            | 795                          | 91                 | 98                             | 140                          |
| Propanal                    | 63719              | 66416                          | 52173                        | 8800               | 8148                           | 9797                         |
| Trans-2-hexenal             | 3154               | 3190                           | 2827                         | 186                | 149                            | 147                          |
| Trans, trans-2.4-hexadienal | 809                | 810                            | 858                          | 88                 | 97                             | 129                          |

**Table S10: Concentrations of carbonyl compounds in nmol L<sup>-1</sup> before, after 2.5 hours and after 5 hours of irradiation for samples collected on June 7<sup>th</sup>.**

| Compound                   | SML                |                                |                              | ULW                |                                |                              |
|----------------------------|--------------------|--------------------------------|------------------------------|--------------------|--------------------------------|------------------------------|
|                            | Before irradiation | After 2.5 hours of irradiation | After 5 hours of irradiation | Before irradiation | After 2.5 hours of irradiation | After 5 hours of irradiation |
| Acetophenone               | 202                | 196                            | 204                          | n.a.               |                                |                              |
| Acrolein                   | 13649              | 20068                          | 24867                        |                    |                                |                              |
| Benzaldehyde               | 10585              | 9610                           | 9324                         |                    |                                |                              |
| Biacetyl                   | 4124               | 3242                           | 4607                         |                    |                                |                              |
| Butanal                    | 7323               | 8037                           | 9254                         |                    |                                |                              |
| Crotonaldehyde             | 1790               | 3223                           | 3804                         |                    |                                |                              |
| Glyoxal                    | 12073              | 14609                          | 12331                        |                    |                                |                              |
| Heptanal                   | 11997              | 10027                          | 10716                        |                    |                                |                              |
| Hexanal                    | 42701              | 36383                          | 28242                        |                    |                                |                              |
| Isovaleraldehyde           | 19947              | 20210                          | 19693                        |                    |                                |                              |
| Methacrolein               | 1158               | 1502                           | 1756                         |                    |                                |                              |
| Methylglyoxal              | 4015               | 4764                           | 5169                         |                    |                                |                              |
| MVK                        | 1949               | 2756                           | 2907                         |                    |                                |                              |
| Octanal                    | 2441               | 2656                           | 1605                         |                    |                                |                              |
| Propanal                   | 80383              | 85070                          | 91676                        |                    |                                |                              |
| Trans-2-hexenal            | 3987               | 4211                           | 3134                         |                    |                                |                              |
| Trans,trans-2,4-hexadienal | 2103               | 2328                           | 2449                         |                    |                                |                              |

105 n.a.: Not available

**Table S11: Concentrations of carbonyl compounds in nmol L<sup>-1</sup> before, after 2.5 hours and after 5 hours of irradiation for samples collected on June 8<sup>th</sup>.**

| Compound                    | SML                |                                |                              | ULW                |                                |                              |
|-----------------------------|--------------------|--------------------------------|------------------------------|--------------------|--------------------------------|------------------------------|
|                             | Before irradiation | After 2.5 hours of irradiation | After 5 hours of irradiation | Before irradiation | After 2.5 hours of irradiation | After 5 hours of irradiation |
| Acetophenone                | 52                 | 119                            | 153                          | 17                 | 29                             | 36                           |
| Acrolein                    | 8831               | 4630                           | 8840                         | 0                  | 0                              | 0                            |
| Benzaldehyde                | 1685               | 2313                           | 2628                         | 193                | 332                            | 419                          |
| Biacetyl                    | 896                | 1497                           | 1693                         | 238                | 311                            | 372                          |
| Butanal                     | 11982              | 5126                           | 6419                         | 34                 | 107                            | 162                          |
| Crotonaldehyde              | n.d.               | 138                            | 1139                         | 1513               | 2042                           | 2353                         |
| Glyoxal                     | 3924               | 5798                           | 5010                         | 208                | 409                            | 423                          |
| Heptanal                    | 5069               | 3890                           | 4083                         | 179                | 0                              | 31                           |
| Hexanal                     | 24200              | 11313                          | 11538                        | 625                | 1357                           | 1898                         |
| Isovaleraldehyde            | 267                | 1182                           | 1553                         | 421                | 554                            | 651                          |
| Methacrolein                | 2333               | 0                              | 0                            | 3                  | 7                              | 11                           |
| Methylglyoxal               | 1360               | 2282                           | 2264                         | 108                | 168                            | 254                          |
| MVK                         | 5555               | 1638                           | 1718                         | 145                | 211                            | 253                          |
| Octanal                     | 585                | 926                            | 689                          | 173                | 402                            | 539                          |
| Propanal                    | 233871             | 49288                          | 60243                        | 77                 | 320                            | 472                          |
| Trans-2-hexenal             | 1934               | 659                            | 780                          | n.d.               | 80                             | 116                          |
| Trans, trans-2.4-hexadienal | 447                | 985                            | 1116                         | 3                  | 7                              | 11                           |

110 n.d.: Not detectable

115

120 **Table S12: Concentrations of carbonyl compounds in nmol L<sup>-1</sup> before, after 2.5 hours and after 5 hours of irradiation for samples collected on June 11<sup>th</sup>.**

| Compound                    | SML                |                                |                              | ULW                |                                |                              |
|-----------------------------|--------------------|--------------------------------|------------------------------|--------------------|--------------------------------|------------------------------|
|                             | Before irradiation | After 2.5 hours of irradiation | After 5 hours of irradiation | Before irradiation | After 2.5 hours of irradiation | After 5 hours of irradiation |
| Acetophenone                | 391                | 171                            | 241                          | 17                 | 21                             | 31                           |
| Acrolein                    | 4234               | 5054                           | 8222                         | 0                  | 0                              | 0                            |
| Benzaldehyde                | 10239              | 4507                           | 6056                         | 292                | 287                            | 430                          |
| Biacetyl                    | 4485               | 3381                           | 4227                         | 384                | 446                            | 345                          |
| Butanal                     | 1821               | 1900                           | 2685                         | 184                | 307                            | 599                          |
| Crotonaldehyde              | 0                  | 0                              | 0                            | 0                  | 0                              | 0                            |
| Glyoxal                     | 1814               | 2376                           | 4213                         | 996                | 941                            | 1032                         |
| Heptanal                    | 2460               | 1609                           | 1146                         | 0                  | 437                            | 392                          |
| Hexanal                     | 11872              | 5818                           | 8741                         | 1203               | 1706                           | 1686                         |
| Isovaleraldehyde            | 6496               | 4965                           | 5607                         | n.d.               | n.d.                           | n.d.                         |
| Methacrolein                | 529                | 273                            | 606                          | n.d.               | n.d.                           | n.d.                         |
| Methylglyoxal               | 1347               | 1531                           | 2699                         | 237                | 268                            | 288                          |
| MVK                         | 2635               | 2296                           | 3113                         | 1401               | 185                            | 164                          |
| Octanal                     | 950                | 322                            | 855                          | 160                | 273                            | 234                          |
| Propanal                    | 4163               | 3998                           | 5948                         | 692                | 1022                           | 1016                         |
| Trans-2-hexenal             | 346                | 222                            | 174                          | n.d.               | 95                             | 9                            |
| Trans, trans-2.4-hexadienal | 80                 | 73                             | 116                          | 28                 | 28                             | 33                           |



**Table S13: Average standard error based on the different measured calibration levels**

| Compound                    | Average standard error |
|-----------------------------|------------------------|
| Acetophenone                | 0.7 %                  |
| Acrolein                    | 4.7 %                  |
| Benzaldehyde                | 5.1 %                  |
| Biacetyl                    | 7.9 %                  |
| Butanal                     | 0.6 %                  |
| Crotonaldehyde              | 1.3 %                  |
| Glyoxal                     | 8.3 %                  |
| Heptanal                    | 2.2 %                  |
| Hexanal                     | 1.8 %                  |
| Isovaleraldehyde            | 2.3 %                  |
| Methacrolein                | 4.0 %                  |
| Methylglyoxal               | 7.9 %                  |
| MVK                         | 2.1 %                  |
| Octanal                     | 1.1 %                  |
| Propanal                    | 3.6 %                  |
| Trans-2-hexenal             | 0.3 %                  |
| Trans, trans-2,4-hexadienal | 0.7 %                  |

## S5 Estimated rates of transfer of carbonyl compounds from the SML to the gas interface

130 The compound-specific rates of transfer of carbonyl compounds from the liquid interface ( $c_{sl}$ ) to the gas interface ( $c_{sg}$ ) in all the samples under study were estimated using the two-layer model (Liss and Slater, 1974).

The already determined compound-specific formation rates in the SML (in  $M h^{-1}$ ) were considered as the concentrations in the liquid interface ( $c_{sl}$ ). The concentrations in the gas interface were then calculated with the following equation:

$$H = \frac{c_{sl}}{c_{sg}} \quad (4)$$

135

Where  $H$  is the apparent partition coefficient (in  $M atm^{-1}$ ). The resulting concentrations in the gas interface are converted from  $atm h^{-1}$  to  $M h^{-1}$  using the Ideal gas law:

$$c_{sg}, M h^{-1} = \frac{n}{V} = \frac{P}{R \times T} \quad (5)$$

140

Where  $n$  is the number of moles (mol),  $V$  is the volume (L),  $P$  is the pressure ( $atm h^{-1}$ ),  $R$  is the ideal gas constant ( $L atm mol^{-1} K^{-1}$ ) and  $T$  is the temperature (K). A constant temperature of 298 K is assumed for all the calculations. Finally, the following equation was applied:

$$145 \text{ Rate of transfer to the gas interface} = c_{sg}, M h^{-1} \times N_A \times SML \text{ thickness} \quad (6)$$

Where  $N_A$  is the Avogadro constant ( $6.022 \times 10^{23}$  molecules  $mol^{-1}$ ). A constant SML thickness of 100  $\mu m$  is assumed for all the calculation. After the corresponding unit conversions, the final rates of transfer from the SML to the gas interface can be expressed in molecules  $cm^{-2} h^{-1}$ .

150

These steps were followed for all the samples investigated in both bloom and non-bloom conditions. The minimum and maximum values were used to define the estimated ranges (Table 2). Negative values were not considered for the ranges.

## References

155

Demas, J. N., Bowman, W. D., Zalewski, E. F., and Velapoldi, R. A.: Determination of the quantum yield of the ferrioxalate actinometer with electrically calibrated radiometers, *J. Phys. Chem.*, 85, 2766-2771, doi: 10.1021/j150619a015, 1981.

Goldstein, S. and Rabani, J.: The ferrioxalate and iodide-iodate actinometers in the UV region, *J. Photoch. Photobio. A*, 193, 50-55, doi: 10.1016/j.jphotochem.2007.06.006, 2008.

160

Hatchard, C. G. and Parker, C. A.: A New Sensitive Chemical Actinometer. II. Potassium Ferrioxalate as a Standard Chemical Actinometer, *Proc. R. Soc. Lon. A Math. Phys. Sci.*, 235, 518-536, doi: 10.1098/rspa.1956.0102, 1956.

Langford, C. H. and Holubov, C. A.: Wavelength and temperature dependence in the photolysis of the chemical actinometer, potassium trisoxalatoferrate(III), at longer wavelengths, *Inorg. Chim. Acta*, 53, L59-L60, doi: 10.1016/S0020-1693(00)84742-8, 1981.

165

Lee, J. and Seliger, H. H.: Quantum Yield of Ferrioxalate Actinometer, *J. Chem. Phys.*, 40, 519-523, doi: 10.1063/1.1725147, 1964.

Liss, P. S. and Slater, P. G.: Flux of Gases Across Air-Sea Interface, *Nature*, 247, 181-184, doi: 10.1038/247181a0, 1974.

Wegner, E. E. and Adamson, A. W.: Photochemistry of Complex Ions .III. Absolute Quantum Yields for Photolysis of Some Aqueous Chromium(III) Complexes. Chemical Actinometry in Long Wavelength Visible Region, *J. Am. Chem. Soc.*, 88, 394-

170

404, doi: 10.1021/ja00955a003, 1966.
